32 **Abstract**

33 Measuring the neutralizing potential of SARS-CoV-2 antigens-exposed sera informs on  
34 effective humoral immunity. This is relevant to 1-monitor levels of protection within an  
35 asymptomatic population, 2-evaluate the efficacy of existing and novel vaccines against  
36 emerging variants, 3-test prospective therapeutic monoclonal neutralizing antibodies (NAbs)  
37 and, overall, to contribute to understand SARS-CoV-2 immunity. However, the gold-  
38 standard method to titer NAbs is a functional assay of virus-mediated infection, which  
39 requires biosafety level 3 (BSL-3) facilities. As these facilities are insufficient in Latin  
40 American countries, including Mexico, scant information has been obtained about NAb in  
41 these countries during the COVID-19 pandemic. An alternative solution to acquire NAb  
42 information locally is to use non-replicative viral particles that display the SARS-CoV-2  
43 Spike (S) protein on their surface, and deliver a reporter gene into target cells upon  
44 transduction. Here we present the development of a NAb-measuring assay based on Nanoluc-  
45 mediated luminescence measurements from SARS-CoV-2 S-pseudotyped lentiviral particle-  
46 infected cells. The successive steps of development are presented, including lentiviral  
47 particles production, target cell selection, and TCID50 determination. We applied the  
48 optimized assay in a BSL-2 facility to measure NAbs in 15 pre-pandemic, 18 COVID-19  
49 convalescent and 32 BNT162b2 vaccinated serum samples, which evidenced the assay with  
50 100% sensitivity, 86.6% specificity and 96% accuracy. The assay highlighted heterogeneity  
51 in neutralization curves which are relevant in discussing neutralization potency dynamics.  
52 Overall, this is the first report of a BSL-2 safe functional assay to measure SARS-CoV-2 in  
53 Mexico and a cornerstone methodology necessary to measure NAb with a functional assay  
54 in the context of limited resources settings.

55

56 **Importance**

57 Evaluating effective humoral immunity against SARS-CoV-2 requires a functional assay  
58 with infectious virus. Handling the authentic SARS-CoV-2 virus requires specialized  
59 facilities that are not readily available in Latin America, including Mexico. Here we produce  
60 non-replicative viral particles pseudotyped with the SARS-CoV-2 S protein that are used as  
61 safe surrogate viral particles in an optimized BSL-2 ready neutralization assay. The  
62 establishment of this assay is critical to allow the evaluation of effective humoral immunity

63 to SARS-CoV-2 post-infection and to monitor the efficacy of existing or novel vaccines  
64 against emerging variants in the Mexican population.

65

## 66 **Introduction**

67

68 Humoral immunity provides critical protection against viruses including memory against  
69 future infections. In particular, neutralizing antibodies (NAbs) specifically target epitopes on  
70 viral membrane proteins, interfering with cell receptor binding<sup>1</sup>. NAbs against SARS-CoV-  
71 2, the causal agent for COVID-19, interfere with viral infection by various potential  
72 mechanisms, all culminating in preventing viral entry<sup>2</sup>. One of these mechanisms is the  
73 binding of the receptor binding domain (RBD) of the S1 subunit of the Spike protein (S) of  
74 SARS-CoV-2, which hampers interactions with the angiotensin converting enzyme 2  
75 (ACE2) receptor on target cells, and therefore blocks viral entry<sup>3</sup>.

76

77 During the natural course of SARS-CoV-2 infection, the early emergence of NAbs prevents  
78 fatal disease<sup>4</sup>. Vaccine induced SARS-CoV-2 NAbs correlate with increased survival,  
79 decreased symptoms severity and reduced risk of re-infection<sup>5,6</sup>. In addition, monoclonal  
80 NAbs prevent SARS-CoV-2 infections *in vitro* and *in vivo*. Various monoclonal NAbs have  
81 been given emergency use authorization by the FDA, such as casirivimab and imdevimab,  
82 while others and are the subject of current clinical trials as therapeutic prospects<sup>7-10</sup>.  
83 However, the regular emergence of variants of concern such as B.1.617.2 (Delta) and more  
84 recently B.1.1.529 (Omicron), motivates continuing vaccine- and directed therapeutic-  
85 research efforts worldwide, including in Mexico<sup>11-13</sup>.

86

87 To monitor the development and prevalence of an effective humoral response against SARS-  
88 CoV-2 and emerging variants in a population, it is therefore essential to measure SARS-CoV-  
89 2-specific NAbs, generated either through natural infection, or through the application of  
90 vaccines. Measuring NAbs requires a functional assay whereby serum samples are co-  
91 incubated with SARS-CoV-2 viral particles (VP), after which the ability of these VP to infect  
92 target cell *in vitro* is measured<sup>14</sup>.

93

94 The use of SARS-CoV-2 reference strains or clinical isolates for NAb titration experiments  
95 requires Biosafety Level 3 (BSL-3) laboratories, which are scarce in Latin America. As a  
96 result, few reports are available about SARS-CoV-2 NAb in the Mexican population, with  
97 all currently available data relying on a neutralization-surrogate ELISA kit<sup>15-17</sup>. During a  
98 pandemic, access to specific research reagents, such as an imported ELISA kit, is limited  
99 which cause long delays to the evaluation of the effectiveness of the national vaccination  
100 program and to the monitoring of the seroprevalence of the disease, both important aspects  
101 in the control of COVID-19.

102

103 An alternative strategy to using authentic virus is to produce non-replicative VP that express  
104 the SARS-CoV-2 S or RBD on their surface and that include a reporter gene delivered to  
105 target cells upon transduction<sup>18-20</sup>. These pseudotyped VP have been widely used to measure  
106 NAbs against a range of potentially fatal viruses, including influenza (H7N9), MERS-CoV,  
107 HCV, and SARS-CoV-2 and recent variants<sup>21-24</sup>. Advantages of using pseudotyped VP to  
108 measure NAbs include the facility of upscaling for high-throughput measurements at a lower  
109 cost, as well as the opportunity to customize the viral glycoprotein to match emerging  
110 variants.

111

112 Various viral backbones have been used to produce VP that express SARS-CoV-2 S in their  
113 membrane, including rhabdoviruses (VSV), retroviruses (MLV), and lentiviruses (HIV-  
114 1)<sup>18,19,25</sup>. Genomes of pseudotyped VP are modified to prevent viral replication, and include  
115 reporter genes such as GFP or luciferases (like fLuc or Nluc), that facilitate transduction  
116 monitoring in target cells<sup>14,26</sup>. Lentiviral systems constitute a popular backbone to  
117 manufacture pseudotyped VP due to their short production time, relative high yields and ease  
118 of handling<sup>27</sup>. Lentiviral systems are available in 2<sup>nd</sup>, 3<sup>rd</sup> and 4<sup>th</sup> generation systems that allow  
119 their safe manipulation in BSL-2 laboratories<sup>28</sup>.

120

121 Here we present the development of a SARS-CoV-2 NAb titration assay based on non-  
122 replicative pseudotyped lentiviral particles integrating Nluc into transduced cells genomes.  
123 The assay facilitated quantification of effective humoral immunity to SARS-CoV-2 in  
124 COVID-19 convalescent patients and BNT162b2 vaccinated individuals. The assay could

125 easily be deployed in BSL-2 laboratories to investigate humoral immunity in infected  
126 patients, effective protection from vaccine administration, and to support therapeutics and  
127 vaccine development and research efforts locally.

128

129

## 130 **Results**

131

### 132 **Development and production of a SARS-CoV-2 pseudotyped lentivirus**

133 To develop a BSL-2-ready assay to investigate neutralizing antibodies to SARS-CoV-2 in  
134 Mexico, we first produced SARS-CoV-2 S-pseudotyped VP. We optimized a previously  
135 reported 3<sup>rd</sup>-generation lentiviral system (Fig. 1) by using the reporter gene Nluc which is  
136 more stable and provides 100x brighter luminescence compared to fLuc<sup>17,20</sup>. SARS-CoV-2  
137 pseudotyped lentiviral vectors were achieved by incorporating a S sequence that lacks the  
138 last 19 amino acids at the C-terminal, reported to increase its incorporation into pseudoviral  
139 membranes compared to the original sequence (Fig. 1A)<sup>25</sup>. The Nluc gene was cloned into  
140 the transfer plasmid within LTRs to allow efficient integration in target cells upon viral entry  
141 (Fig. 1C). Additional plasmids were produced as controls, to express either the glycoprotein  
142 of VSV virus (VSV-G) that binds to the ubiquitously expressed low-density lipoprotein  
143 (LDL), or no glycoprotein (Fig. 1A)<sup>18,23</sup>. The integrity of all the constructions used in this  
144 work was verified by Sanger sequencing with 100% identity (Fig. S1).

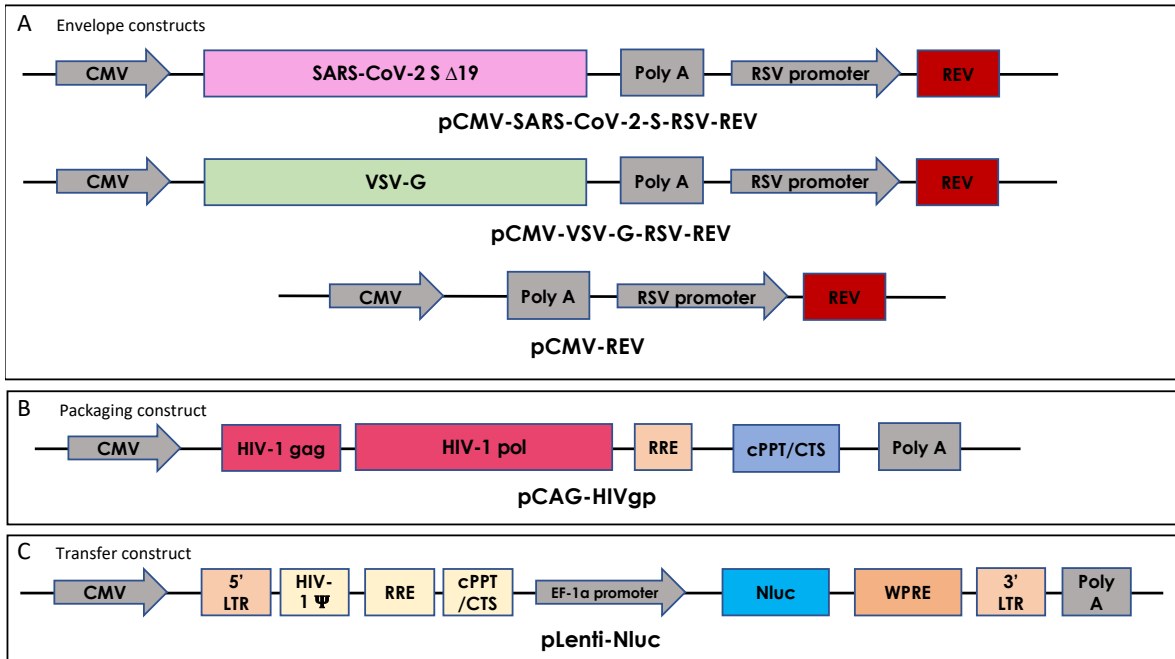

145

146 **Fig. 1.** Schematic representation of constructs developed as part of a third-generation  
 147 lentiviral-based system to produce VP pseudotyped either with SARS-CoV-2 S, VSV-G or  
 148 no envelope protein.

149

150 The selective expression of relevant viral proteins in produced VP was investigated using  
 151 western blots. The presence of the structural protein p24, core component of the lentiviral  
 152 particles, was confirmed in the 3 types of VP produced (Fig. 2A)<sup>24</sup>. A specific band of 70  
 153 kDa was observed selectively in the VSV-G VP sample, which is consistent with the expected  
 154 size of VSV-G (Fig. 2B)<sup>29</sup>. The selective incorporation of the S protein in SARS-CoV-2 S  
 155 VP was confirmed with the detection of a 110 kDa band, using a chimeric monoclonal  
 156 antibody, while in the same gel, no protein was detected for the VSV-G expressing VP (Fig.  
 157 2C)<sup>20</sup>.

158

159

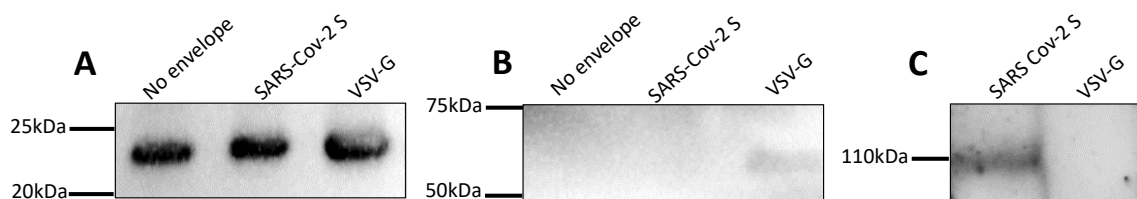

160 **Fig. 2.** Western blot analysis of produced VP. A: The structural protein p24 was detected on  
161 the 3 types of VP. B: VSV-G was selectively detected on VSV-G VP but not on either SARS-  
162 CoV-2 S or no-envelope protein VP. C: The S protein was detected as a 110 kDa protein on  
163 SARS-CoV-2 VP using a chimeric monoclonal antibody, but not on VSV-G VP. Detection  
164 of viral proteins was performed twice and one is shown.

165

### 166 **Optimization of a SARS-CoV-2 pseudovirus-based neutralization assay**

167 ACE2 expression on cell surfaces correlates with SARS-CoV-2 infection susceptibility *in*  
168 *vitro*<sup>30</sup>. Therefore, we sought to select the most appropriate target cell line for the infection  
169 assay by investigating ACE2 expression on exposed cell membranes of various cell lines  
170 known to endogenously express ACE2 and that have been previously reported as target cells  
171 for SARS-CoV-2 and pseudotyped VP<sup>23,31–33</sup>. Caco-2 showed 16% of ACE2 positivity in  
172 culture, while Vero and Vero E6 were homogeneously highly expressing cells with 92% and  
173 73% positivity, respectively (Fig. 3A). Heterogeneity in ACE2 expression was recently  
174 reported between single cells of various cell lines, with expression being modulated during  
175 culture and regulated epigenetically<sup>34</sup>. Here, Vero cells had a significantly higher expression  
176 of ACE2 on cell surfaces compared to all other cell lines tested while HEK-293T lacked  
177 expression of ACE2 (Fig. 3B), as previously described<sup>35</sup>. Surface expression of ACE2  
178 suggested that Vero cells would be the most susceptible to infection by SARS-CoV-2  
179 pseudotyped-VP. Other techniques have been applied with mixed results to investigate ACE2  
180 expression by target cells, including Western blot and qRT-PCR, both precluding distinction  
181 between membrane-displayed and cytosolic stores of ACE2 in contrast with flow  
182 cytometry<sup>36,37</sup>. However, as additional membrane proteins such as TMPRSS2 and neuropilin-  
183 1 have been evidenced as SARS-CoV-2 VP entry facilitators, the expression of ACE2 may  
184 not be sufficient on its own to predict susceptibility to infection<sup>19,34,38</sup>.

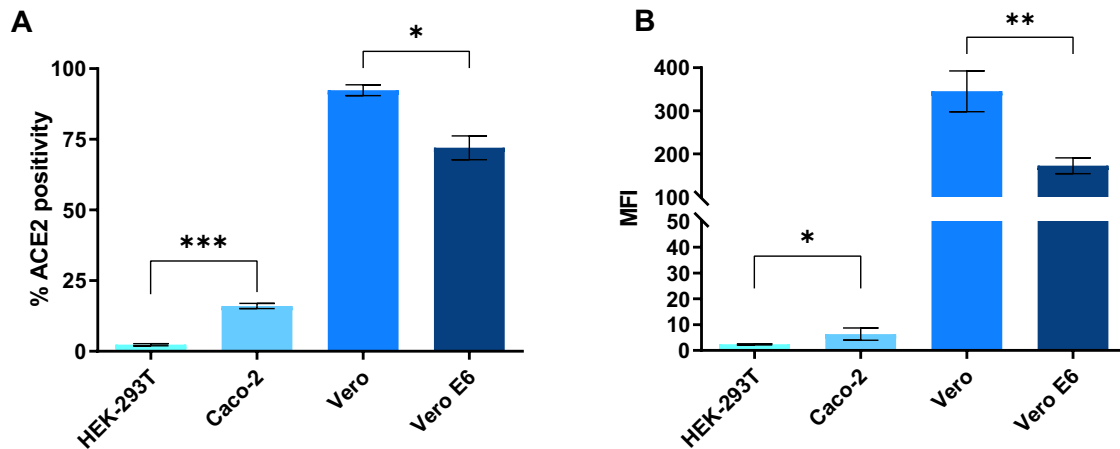

185

186 **Fig. 3.** Expression of ACE2 on the surface of HEK-293T, Caco-2, Vero, and Vero E6 cells.

187 A: Proportion of cells expressing ACE2 B: Relative expression of ACE2 on cell surface as  
188 expressed by median fluorescence intensity (MFI) of ACE2-AF647. Average of 3 separate  
189 experiments done in duplicate with standard deviations shown.  $p < 0.05$  (\*),  $p < 0.01$  (\*\*),  $p$   
190  $< 0.001$  (\*\*\*)).

191

192 Accordingly, to compare infection susceptibility of ACE2-expressing cell lines by SARS-  
193 CoV-2 pseudotyped-VP, we co-cultured Caco-2, Vero and Vero E6 with SARS-CoV-2  
194 pseudotyped-VP and measured Nluc activity as a surrogate marker for infection. Vero cells  
195 produced the highest RLUs (mean =  $9.5 \times 10^5$ ,  $8.4 \times 10^5$  and  $6.8 \times 10^5$  RLUs for Vero, Vero  
196 E6 and Caco-2, respectively, Fig. 4A), consistent with high ACE2 expression on cell surfaces  
197 (Fig. 3). Vero and Vero E6 exhibited similar susceptibility to VSV-G with an average of  $9$   
198  $\times 10^5$  and  $8.7 \times 10^5$  RLUs, respectively. On the other hand, Caco-2 showed a third of the Vero  
199 lines response (mean =  $3.1 \times 10^5$  RLUs, Fig. 4B). Interestingly, a previous report using a  
200 VSV-pseudotyped VP system showed Caco-2 had similar susceptibility to VSV-G VP and  
201 SARS-CoV-2 VP<sup>19</sup>. However, the complete SARS-CoV-2 S sequence was used in this case,  
202 while in the present work the use of a SARS-CoV-2-S  $\Delta 19$  sequence which increases the  
203 incorporation of S in VP membranes, statistically augments opportunities for ACE2 binding  
204 and cell entry, and increasing the susceptibility. This is a possible cause for the reported  
205 differences in VSV-G-mediated and SARS-CoV-2-S  $\Delta 19$ -mediated infections of Caco-2  
206 cells. Culturing cell lines together with VP that lacked surface glycoprotein led to a 30-fold



207 decrease in infection rates, compared to infections with SARS-CoV-2 S VP, with RLUs  
208 consistently  $< 3 \times 10^4$ , as expected<sup>3</sup>. Observed basal levels of non-specific viral entry have  
209 been reported and may be a consequence of endocytosis<sup>35</sup>. Overall, we replicated previous  
210 findings confirming Vero cells are highly susceptible to transduction with SARS-CoV-2 VP,  
211 leading further experiments to be performed with the Vero cell line<sup>24</sup>. To identify the amount  
212 of VP required to transduce 50% of the culture (TCID50), as relevant to investigate the effect  
213 of an inhibitor in biological assays, we performed a serial dilution of the SARS-CoV-2  
214 pseudotyped-VP and applied the Reed-Muench method (Sup. Fig. 2)<sup>39,40</sup>. We identified 15  
215 pg SARS-CoV-2 pseudotyped-VP were necessary to infect 50% of 25,000 Vero cells in a  
216 96-well plate at 24 h post-inoculation.

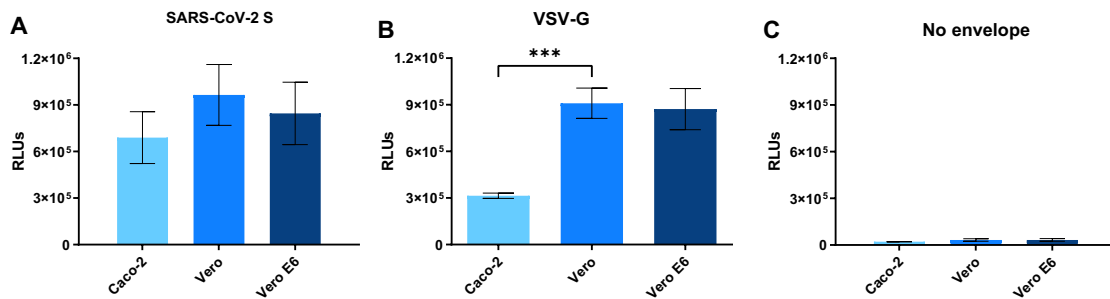

217  
218 **Fig. 4.** Transduction levels in Caco-2, Vero, and Vero E6 cells 24 h post-inoculation with  
219 VP, as evidenced by luminescence in relative light units (RLUs) caused by Nluc digestion of  
220 a furimazine substrate. The 3 cell lines were infected with 140 pg VP pseudotyped using A:  
221 SARS-CoV-2 S, B: VSV-G, or C: no envelope glycoprotein. Results represent the average  
222 of 3 separate experiments performed in duplicate, and standard deviations of these results are  
223 shown,  $p < 0.001$  (\*\*\*)  
224

#### 225 Neutralization of SARS-CoV-2 S lentiVP by convalescent and vaccinated sera

226 Once assay parameters were optimized, neutralization of transduction with human sera was  
227 implemented. Sera collected prior to the start of the COVID-19 pandemic, sera from COVID-  
228 19 diagnosed patients, and sera from health professionals that had received the BNT162b2  
229 vaccine were used (Tables 1 and 2). Pre-pandemic sera showed neutralization of the SARS-  
230 CoV-2 pseudotyped-VP ranging between 11.6% and 41% at the lowest (1:5) dilution tested,  
231 and ranging between 20.2% and 4.6% at the highest tested dilution (1:9860, Fig. 5A). These

232 results are consistent with the literature, where dilution-dependent, consistent, minimal cross-  
233 neutralization of SARS-CoV-2 VP by pre-pandemic sera are reported but considered  
234 insignificant for preventing COVID-19<sup>18,23,41</sup>. In another report, antibodies produced by  
235 various B cell clones obtained from a SARS-CoV 2003 outbreak survivor could efficiently  
236 neutralize SARS-CoV-2 and a SARS-related bat virus suggesting some levels of cross-  
237 neutralization<sup>42</sup>. All sera with prior exposure to SARS-CoV-2 (through natural infection or  
238 vaccination) could neutralize SARS-CoV-2 pseudotyped-VP efficiently. Convalescent  
239 COVID-19 sera were heterogeneous in their neutralization potential, with the lowest dilution  
240 (1:5) neutralizing between 95.9% and 58.5% of infection, and half of tested serum samples  
241 had a 30% neutralization titer of 540 (Fig. 5B, Table1). Of note, the similar neutralization  
242 rates observed at the 1:5 and 1:20 dilutions (means = 76.25 % and 74.7%, SD = 13. 6 and  
243 11.6, respectively) suggest that overall NAbs contained in COVID-19 diluted down to 1:20  
244 were in excess over VP. In contrast with convalescent sera, 14 out of 16 vaccinated samples  
245 (87.5%) had a 30% neutralization titer of 540 after the first BNT162b2 dose, and all samples  
246 had a 30% neutralization titer >540 post-boost. Six out of the 16 individuals in the vaccinated  
247 cohort had COVID-19 positive diagnostic prior to vaccination without notable impact on  
248 reported neutralization rates (Table 2). Two individuals showed slight decrease in  
249 neutralization after the second dose (Table 2), which has been reported before<sup>16</sup>. Importantly,  
250 the potency of vaccinated sera was higher than COVID-19 sera, with >18% vaccinated sera  
251 (3/16) having a 30% neutralization titer of 9860, versus only 5.5% COVID-19 sera (1/18).  
252 Using these values the presented assay has a 100% sensitivity, 86.6% specificity and 95.9%  
253 accuracy (Fig. 5D) using 1:20 serum dilution, as previously reported for such calculations <sup>43</sup>.  
254 Looking at individual neutralization curves, there was no consensus pattern across serum  
255 dilution (Fig. 6). Some samples exhibited similar % neutralization at the lowest dilution after  
256 the first and 2<sup>nd</sup> vaccine doses (as shown in representative samples ID 43, ID 46), while others  
257 evidenced increased neutralization at the lowest dilution after the 2<sup>nd</sup> dose (exemplified by  
258 ID 44, and to a lower extent ID 42). The shapes of neutralization curves could be concave  
259 with a slow decrease in neutralization before reaching EC50 (ID 39, ID 42, ID 21), or convex  
260 with a sharp slope around EC50 (ID 41, ID 44) and these differences could be observed  
261 within a same individual, between 2 samples (ID 43). Interestingly, the curve of convalescent  
262 patient ID 21 exhibited constant, moderately high neutralization >75% between 1:5 and 1:

263 540 serum dilutions, followed by a sharp decrease in neutralization between serum dilutions  
264 1:540 and 1:9860. Due to the shape of this curve, EC50 is extremely low suggesting very  
265 potent neutralization serum, however the patient suffered severe symptoms and passed away  
266 (Table 1).

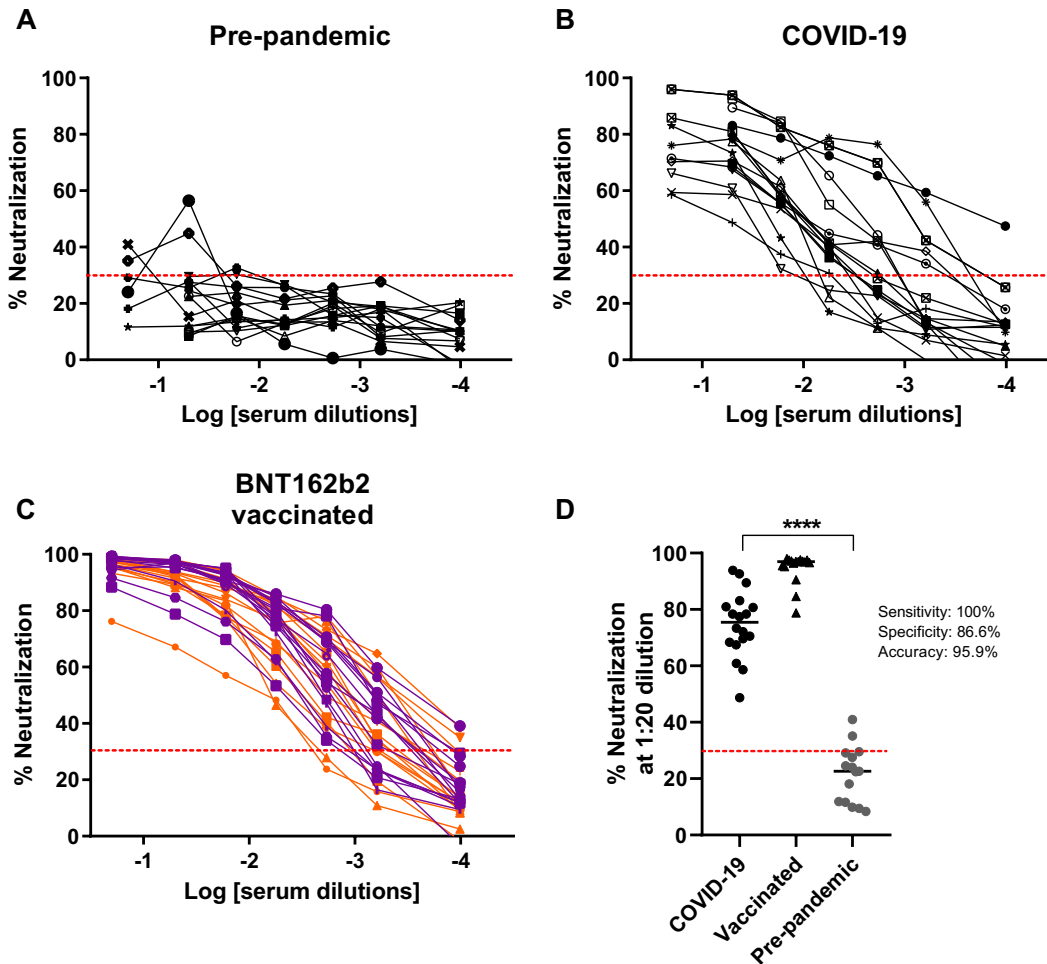

267  
268 **Fig. 5:** Measurement of SARS-CoV-2 S pseudotyped VP-neutralization activity from human  
269 samples. A: Pre-pandemic sera. B: Covid-19 convalescent sera. C: BNT162b2 vaccinated  
270 sera. **Orange:** sample obtained on average 19 days [range: 13-22] after the first vaccine dose,  
271 **purple:** sample obtained days on average 26 days [range: 22-29] after the 2<sup>nd</sup> vaccine dose.  
272 D: Calculations of assay sensitivity, specificity and accuracy using neutralization results at  
273 1:20 sera dilutions. The dotted line represents an arbitrary 30% neutralization cutoff for titers  
274 estimation.  $p < 0.0001$  (\*\*\*\*).

275

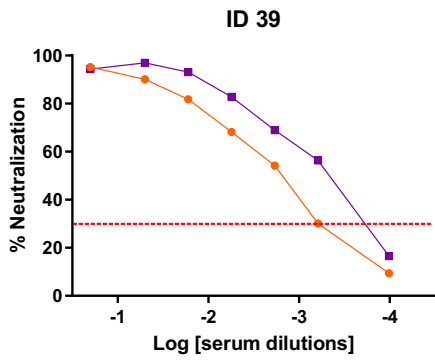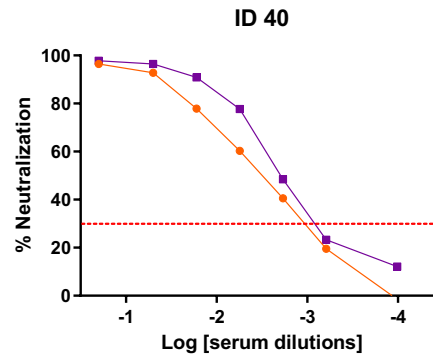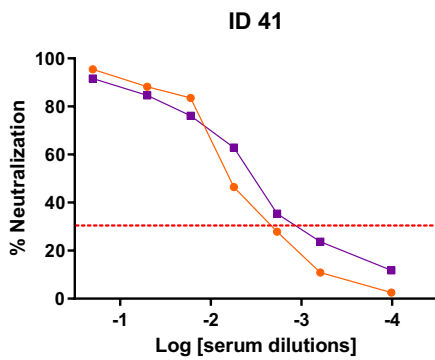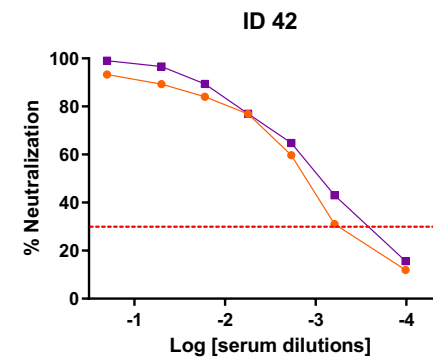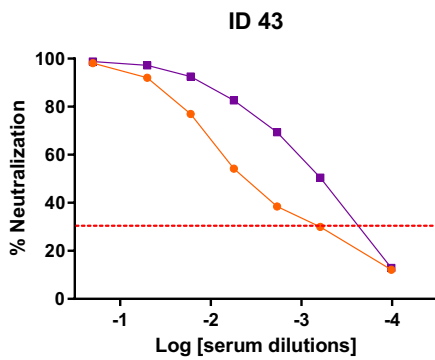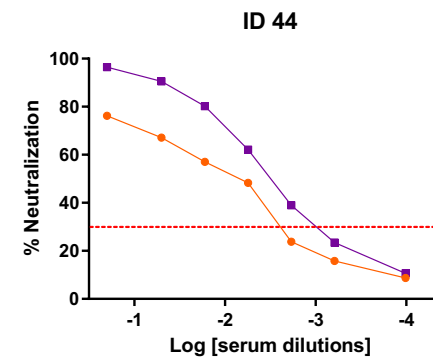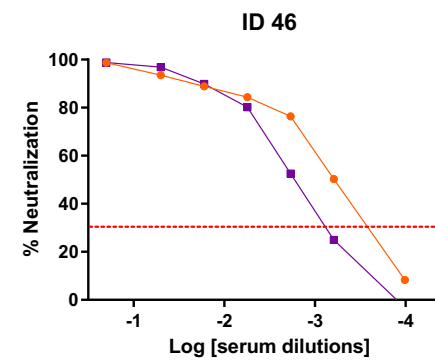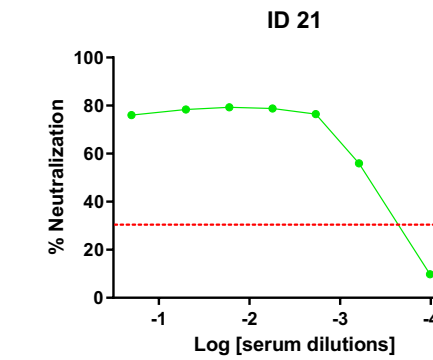

277 **Fig. 6:** Example of individual patterns of neutralization. **Orange:** first dose of BNT162b2  
278 vaccine, **purple:** second dose BNT162b2 vaccine, **green:** COVID-19 sera sample. Dotted line  
279 represents an arbitrary 30% neutralization cutoff.

280

281

282 Table 1: Clinical parameters and neutralization information from COVID-19 convalescent sera

| ID | COVID-19 diagnostic q-PCR validated | Gender | Age | Days after initiation of symptoms at the time of sampling | Severity | Hospitalization status | Artificial respiration | Patient outcome | ECSO       | R <sup>2</sup> | % Neutralization 1:20 sample dilution |
|----|-------------------------------------|--------|-----|-----------------------------------------------------------|----------|------------------------|------------------------|-----------------|------------|----------------|---------------------------------------|
| 2  | Positive                            | M      | 42  | 0                                                         | Asx/Mild | Outpatient             | NA                     | Recovered       | 0.001401   | 0.972          | 83.03                                 |
| 4  | Positive                            | F      | 65  | 19                                                        | Asx/Mild | Outpatient             | NA                     | Recovered       | 0.004868   | 0.977          | 69.01                                 |
| 7  | Positive                            | F      | 76  | 17                                                        | Asx/Mild | NA                     | NA                     | Recovered       | 0.023690   | 0.959          | 66.17                                 |
| 10 | Positive                            | M      | 58  | 11                                                        | Asx/Mild | Outpatient             | NA                     | Recovered       | 0.004090   | 0.861          | 70.25                                 |
| 11 | Positive                            | M      | 58  | 30                                                        | Asx/Mild | Outpatient             | NA                     | Recovered       | 0.006593   | 0.974          | 80.66                                 |
| 15 | Positive                            | F      | 62  | 26                                                        | Severe   | Severe                 | NA                     | Recovered       | 0.007370   | 0.996          | 67.46                                 |
| 18 | Positive                            | M      | 53  | 77                                                        | Severe   | Severe                 | NA                     | Recovered       | 0.011600   | 0.998          | 78.39                                 |
| 21 | Positive                            | M      | 42  | 16                                                        | Severe   | Severe                 | NA                     | Deceased        | 0.00000031 | 0.976          | 76.02                                 |
| 23 | Positive                            | M      | 43  | 18                                                        | Severe   | Severe                 | NA                     | Recovered       | 0.018150   | 0.998          | 83.03                                 |
| 25 | Positive                            | M      | 59  | 19                                                        | Severe   | Severe                 | NA                     | Deceased        | 0.013700   | 0.966          | 58.58                                 |
| 27 | Positive                            | M      | 36  | 9                                                         | Severe   | Severe                 | Yes                    | Deceased        | 0.003756   | 0.998          | 59.37                                 |
| 28 | Positive                            | M      | 36  | 16                                                        | Severe   | Severe                 | Yes                    | Deceased        | 0.005466   | 0.935          | 71.41                                 |
| 29 | Positive                            | M      | 36  | 23                                                        | Severe   | Severe                 | NA                     | Deceased        | 0.000934   | 0.976          | 95.92                                 |
| 31 | Positive                            | M      | 34  | 19                                                        | Asx/Mild | Outpatient             | NA                     | Recovered       | 0.009537   | 0.944          | 86.85                                 |
| 32 | Positive                            | F      | 35  | 21                                                        | Asx/Mild | Outpatient             | NA                     | Recovered       | 0.001044   | 0.996          | 89.45                                 |
| 33 | Positive                            | M      | 66  | 17                                                        | Severe   | Severe                 | NA                     | Recovered       | 0.010410   | 0.990          | 85.83                                 |
| 34 | Positive                            | M      | 52  | 21                                                        | Severe   | Severe                 | NA                     | Recovered       | 0.002027   | 0.979          | 92.59                                 |
| 36 | Positive                            | M      | 49  | 9                                                         | Asx/Mild | Outpatient             | NA                     | Deceased        | 0.010780   | 0.983          | 77.48                                 |

283  
 284 NA: Unavailable information ; Asx : asymptomatic. Highlighted cells represent longitudinal samples from same patients  
 285 (patient male 58 y.o, sample IDs 10-11; Patient male 36 y.o, sample IDs 27-29).

286  
 287  
 288  
 289  
 290  
 291  
 292  
 293  
 294

295 Table 2: Clinical and neutralization information from BNT162b2 vaccinated individuals

| ID | COVID-19 Diagnosis | Gender | First dose                                               |          |                | Boost                          |                                                          |          |                |                                |
|----|--------------------|--------|----------------------------------------------------------|----------|----------------|--------------------------------|----------------------------------------------------------|----------|----------------|--------------------------------|
|    |                    |        | Days post vaccine administration at the time of sampling | EC50     | R <sup>2</sup> | % Neutralization 1:20 dilution | Days post vaccine administration at the time of sampling | EC50     | R <sup>2</sup> | % Neutralization 1:20 dilution |
| 39 | Negative           | F      | 16                                                       | 0.001683 | 0.992          | 90.14                          | 28                                                       | 0.000554 | 0.986          | 96.93                          |
| 40 | Negative           | F      | 14                                                       | 0.002394 | 0.999          | 92.78                          | 29                                                       | 0.002260 | 1.000          | 96.44                          |
| 41 | Negative           | F      | 14                                                       | 0.005097 | 0.990          | 88.19                          | 29                                                       | 0.003490 | 0.996          | 84.59                          |
| 42 | Positive recovered | M      | 14                                                       | 0.001225 | 0.996          | 89.29                          | 28                                                       | 0.000724 | 0.999          | 96.60                          |
| 43 | Negative           | M      | 14                                                       | 0.005883 | 0.988          | 92.08                          | 29                                                       | 0.000278 | 1.000          | 97.21                          |
| 44 | Negative           | F      | 16                                                       | 0.004726 | 0.989          | 67.14                          | 28                                                       | 0.003606 | 1.000          | 90.52                          |
| 45 | Negative           | M      | 16                                                       | 0.001136 | 0.995          | 93.80                          | 28                                                       | 0.002407 | 0.992          | 97.02                          |
| 46 | Negative           | F      | 16                                                       | 0.000439 | 0.994          | 93.57                          | 27                                                       | 0.001298 | 0.999          | 96.91                          |
| 47 | Positive recovered | M      | 16                                                       | 0.000781 | 0.951          | 93.25                          | 27                                                       | 0.000683 | 0.993          | 95.54                          |
| 48 | Negative           | F      | 16                                                       | 0.000916 | 0.979          | 98.04                          | 27                                                       | 0.000940 | 1.000          | 97.59                          |
| 49 | Negative           | F      | 14                                                       | 0.001746 | 0.995          | 97.60                          | 28                                                       | 0.001864 | 0.992          | 97.51                          |
| 50 | Negative           | F      | 14                                                       | 0.001030 | 0.986          | 97.36                          | 28                                                       | 0.001096 | 0.999          | 98.07                          |
| 51 | Positive recovered | F      | 14                                                       | 0.003675 | 0.980          | 92.60                          | 28                                                       | 0.001998 | 0.997          | 97.16                          |
| 52 | Positive recovered | F      | 13                                                       | 0.001203 | 0.998          | 96.58                          | 27                                                       | 0.004783 | 0.997          | 78.76                          |
| 53 | Positive recovered | F      | 16                                                       | 0.000000 | 0.998          | 91.51                          | NA                                                       | 0.000967 | 0.975          | 97.56                          |
| 54 | Positive recovered | F      | 16                                                       | 0.003309 | 0.981          | 89.43                          | 28                                                       | 0.001489 | 0.981          | 95.23                          |

296

297 NA: Unavailable information

298

299

### 300 **Comparison between NAb titers and anti-SARS-CoV-2 S IgG concentrations**

301 To compare SARS-CoV-2 NAb and total IgG titers, 14 sera from either vaccinated (Pfizer-  
302 BioNTech, 2<sup>nd</sup> dose) or COVID-19 diagnosed individuals were selected to measure total  
303 SARS-CoV-2 S IgG from samples that together exhibited a spectrum of neutralization  
304 ranging between 58% and 97.5%. Total IgG against SARS-CoV-2 S1+S2 were measured in  
305 the aforementioned samples, and in 7 randomly selected pre-pandemic serum samples, using  
306 a quantitative ELISA. Vaccinated and COVID-19 samples contained similar average titers  
307 of anti-SARS-CoV-2 S-specific IgG antibodies (Fig. 7A, 0.095 and 0.085 mg/L,  
308 respectively). These concentrations were on average 30% higher compared to titers measured  
309 in pre-pandemic sera (Fig. 7A). A similar increase over naïve serum concentration has been  
310 previously observed using an ELISA specific for SARS-CoV-2 S1<sup>40</sup>. A significant difference  
311 in total IgG concentration was evidenced between the vaccinated group and pre-pandemic  
312 group only, as the COVID-19 group presented a larger distribution of concentrations. Larger  
313 differences have been described in anti-SARS-CoV-2 S total IgG between pre-pandemic sera  
314 and sera from individuals exposed to SARS-CoV-2 antigens<sup>41</sup>. To investigate neutralization  
315 in these samples, we used the pseudotyped VP-based neutralization assay developed here.  
316 As evidenced earlier, an overall significantly higher neutralization was observed for both  
317 COVID-19 and vaccinated groups compared to the pre-pandemic group ( $p = 0.0006$  for both  
318 comparisons). In addition, there was significantly more neutralization from vaccinated  
319 samples compared to individuals exposed to the virus through infection (Fig. 7B,  $p = 0.0006$ ),  
320 in contrast with total IgG concentrations between these groups. Higher titers of anti-SARS-  
321 CoV-2 NAb in individuals vaccinated with BNT162b2 compared to COVID-19 patients have  
322 been extensively described<sup>16,42</sup>. In summary, after exposure to the antigen, a wide range of  
323 concentrations of anti-SARS-CoV-2 S total IgG could be measured while neutralization was  
324 restricted between 58% and 97.5% (Fig. 7C). Others have similarly evidenced a range of  
325 concentrations for total IgG between 10-100 mg/ml for COVID-19 patients while  
326 neutralization was constrained to  $>95\%$ <sup>42</sup>.

327



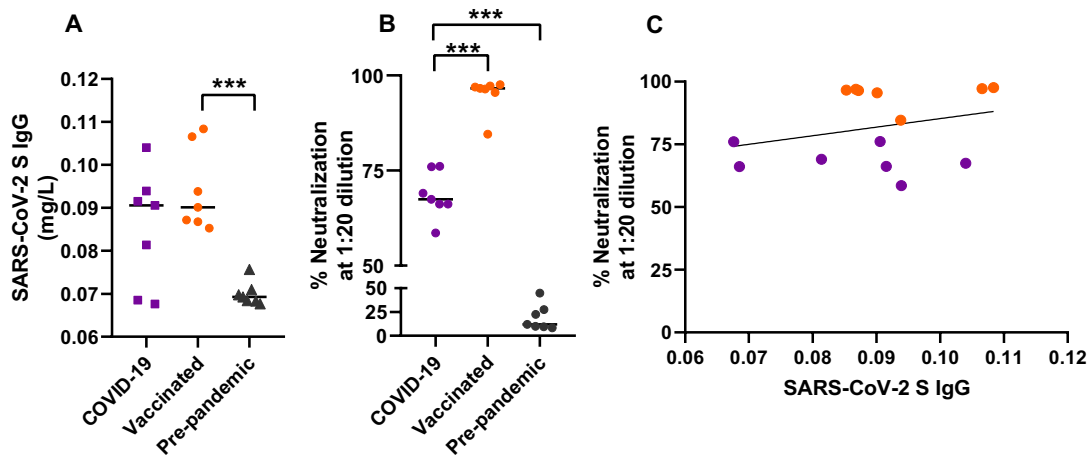

328

329 **Fig. 7.** Anti-SARS-CoV-2 S total IgG underestimates neutralization potential evaluated using  
330 the SARS-CoV-2 pseudotyped VP-based assay. A: SARS-CoV-2 S ELISA-based  
331 quantification of total IgG in COVID-19 convalescent sera, BNT162b2 vaccinated sera and  
332 pre-pandemic sera. B: SARS-CoV-2 S VP neutralization by matched sera (used in A) at 1:20  
333 dilution. C: Correlation 1:20 sera neutralization potential vs. SARS-CoV-2 S total IgG.  
334 **Purple:** COVID-19 convalescent sera, **orange:** vaccinated sera,  $p < 0.001$  (\*\*\*)  
335

336

337

## 338 Discussion

339

340 As SARS-CoV-2 becomes endemic in human populations worldwide, various selective  
341 pressures drive the emergence of viral variants with distinct transmissibility profiles<sup>44</sup>. These  
342 variants in turn shape humoral immunity through specific B cell clone selection, which may  
343 compromise the efficacy of existing vaccines and increase threshold for herd immunity<sup>45</sup>. In  
344 addition, the half-life of SARS-CoV-2 humoral immunity, including NAbs, decays over a  
345 few months, regardless of the immunization route (natural infection or vaccination)<sup>6,46</sup>.

346 Mexico has a high prevalence of comorbidities known to increase COVID-19 severity, such  
347 as obesity, diabetes and cardiovascular disease, and has experienced higher fatality rates than  
348 the global average<sup>47-49</sup>. Scarce reports are available about SARS-CoV-2 NAb in the Mexican  
349 population, with all available data relying on a neutralization-surrogate ELISA kit<sup>15-17</sup>.  
Herein we propose a BSL-2 safe functional assay to investigate effective humoral immunity

350 against SARS-CoV-2 locally. We produced lentiviral particles bearing SARS-CoV-2 S and  
351 optimized a highly sensitive and accurate assay of pseudotyped VP neutralization that can be  
352 deployed in most research laboratories in the country to support studies of SARS-CoV-2  
353 induced humoral immunity.

354

355 Various pseudotyped VP-based systems have been used worldwide to assess sera- and  
356 therapeutic antibody-mediated SARS-CoV-2 neutralization, each with intrinsic protocolar  
357 and technical characteristics that have been discussed elsewhere<sup>14,20</sup>. Various assay  
358 parameters can be customized, affecting the results. For instance, the neutralization assay  
359 presented here has a turn-around time of 24 h after VP inoculation, while others have  
360 investigated neutralization as early as 12 h and up to 72 h<sup>44,50</sup>. Longer incubation times  
361 increase infection probability therefore comparing neutralization titers obtained using  
362 different incubation lengths could be biased<sup>35,51,52</sup>.

363

364 Luminescence (as a transduction surrogate marker) increases with the amount of VP applied  
365 to target cells. Accordingly, an additional factor affecting results is the differential  
366 incorporation of SARS-CoV-2 S on VP membranes, depending on the VP production  
367 technique used<sup>23</sup>. Using a SARS-CoV-2 sequence lacking the last 19 amino acids at the C-  
368 terminal is known to increase VP membrane incorporations<sup>3</sup>. Therefore, with all other  
369 parameters equal, a pseudoviral system using the authentic SARS-CoV-2 S sequence may  
370 result in lower RLUs compared to using the SARS-CoV-2 S  $\Delta$ 19 sequence, precluding  
371 adequate comparisons.

372

373 In this work, we used Nluc as a reporter gene with luminescence as assay read-out. This  
374 engineered and enhanced form of luciferase, provides a very sensitive assay, with reports of  
375 single cell infections detected<sup>20</sup>. However, furimazine is an expensive substrate. As an  
376 alternative, others have reported the development of systems relying on fluorescence  
377 measurement to assess transduction<sup>20,53</sup>. These assays may not be as sensitive as  
378 luminescence-based methods but could be cheaper when applied in high-throughput  
379 screening.

380

381 The MOI, or amount of VP added per target cell, is also critical for reaching TCID<sub>50</sub> within  
382 the timeframe of the assay. While some articles report volumes and dilutions of untitrated  
383 viral stock added per well, others titrate VP concentrations to provide a precise MOI<sup>44,54</sup>.

384

385 Target cells can be attached to wells at a pre-defined concentration at the time of adding the  
386 serum-VP mixture, or alternatively single cell suspensions of target cells may be added to  
387 the co-incubated serum-VP mixture<sup>50</sup>. As proteolytic cleavage of ACE2 by ADAM17 and  
388 TMPRSS2 affects susceptibility to infection, it is possible that recent trypsin treatment also  
389 impact ACE2 cleavage on target cells<sup>55,56</sup>. In this sense it would be relevant to compare  
390 assays with similar protocolar details for inoculation (adding VP to adherent cells, or adding  
391 freshly trypsinized cells to VP).

392

393 Finally, the neutralization threshold used to analyze results is arbitrary, with reports showing  
394 analyses using thresholds ranging between 20% and 50% neutralization<sup>23,51,57</sup>. This  
395 threshold is used to determine “positivity” of neutralization, and therefore affects reported  
396 neutralization titers (last dilution before neutralization curves cross the threshold), and  
397 calculated sensitivity and specificity of each assay. The aforementioned pitfalls have  
398 highlighted the need for a standardized assay to compare neutralization results across cohorts  
399 and worldwide<sup>58</sup>.

400

401 We evidenced more variability in the magnitude of COVID-19 neutralization curves,  
402 compared to vaccinated sera. Potent NAb clones have been isolated from both high and low  
403 neutralizing titers in COVID-19 patients, which suggests SARS-CoV-2 infection hampers  
404 appropriate B cell maturation and expansion<sup>59,60</sup>. Much remains to be clarified about the  
405 significance of NAb titers. For instance, in COVID-19 patients, NAb titers positively  
406 correlate with disease severity<sup>41,57,61,62</sup>. On the other hand, a study reported that about 30%  
407 of individuals recovered from mild COVID-19 did not present NAb titers, hinting that other  
408 components of the immune system strongly contribute to recovery<sup>59</sup>. As evaluating T cell-  
409 mediated immunity to SARS-CoV-2 *in vitro* remains a challenge, monitoring NAb is  
410 mandatory to provide clues needed to elucidate immune requirements for protection against,  
411 and recovery from, SARS-CoV-2 infections. Vaccine development also requires an easily

412 adapted and safe-to-use platform to measure the induction of immune response, in particular,  
413 the detection of NAbs generated in response to the inoculated antigen. The assay developed  
414 in this work could be easily adapted to emerging variants by either applying directed  
415 mutagenesis to the S sequence, or replacing it with a synthetic gene<sup>53</sup>. As vaccines may need  
416 to be adapted to target emerging variants of concern, effective immunity brought by novel  
417 vaccines and variant-mediated infections can be monitored locally using this assay. We  
418 foresee the proposed platform will shed light onto the development and characterization of  
419 humoral immunity to SARS-CoV-2 in Mexico and Latin America.

420

421

## 422 **Material and Methods**

423

### 424 **Vector constructions**

425 The pCAG-HIVgp and pCMV-VSV-G-RSV-REV plasmids were acquired through the  
426 Riken Institute BioResource Center<sup>53</sup>. The pCMV-SARS-CoV-2-S-RSV-REV plasmid was  
427 produced by cloning the SARS-CoV-2 S sequence, obtained from pCMV14-3X-Flag-SARS-  
428 CoV-2 S which encodes codon optimized SARS-CoV-2 S protein lacking the last 19 amino  
429 acids at the C-terminal<sup>3</sup>, in place of the VSV-G gene, between the *NheI* and *XbaI* restriction  
430 sites. The pLenti-Nluc was produced by cloning the Nluc sequence amplified from pCCI-  
431 SP6-ZIKV-Nluc, between the *XbaI* and *BamHI* restriction sites within the pLentiCRISPR v2  
432 backbone (cat. 52961, Addgene, Massachusetts, USA.) and removing the Cas9 gene. We  
433 produced the plasmid pCMV-REV by removing the envelope protein gene from pCMV-  
434 VSV-G-RSV-REV. All constructions were verified by restriction mapping and validated by  
435 Sanger sequencing (Sup. Fig. 1).

436

### 437 **Cell culture**

438 HEK-293T (ATCC CRL-3216), Vero (ATCC CCL-81), Vero E6 (ATCC CRL-1586) and  
439 Caco-2 (HTB-37) cells were obtained from ATCC and maintained in high-glucose DMEM  
440 (Caisson, cat. DML10) supplemented with 10% heat inactivated FBS (Sigma, Missouri,  
441 USA. cat. F2442) at 37 °C in a 5% CO<sub>2</sub> atmosphere. Cells were passaged according to  
442 provider's instructions, using either gentle scrapping or brief exposure to trypsin (Hyclone,  
443 Massachusetts, USA. cat. C838R55). All cell lines were used before passage 25.

444

#### 445 **Production of SARS-CoV-2 Spike-expressing lentiviral particles**

446 Plasmids pLenti-Nluc, pCAG-HIVgp, and pCMV-SARS-CoV-2-S-RSV-REV were co-  
447 transfected at a 3:2:1 DNA ratio using the calcium phosphate method to confluent HEK-293T  
448 cells. This transfection protocol was also used to generate the other VP used in this work  
449 (without glycoprotein or with VSV glycoprotein). Transfected cells were incubated at 37 °C  
450 with 5% CO<sub>2</sub> for 24 h before replacing the medium to DMEM with 10% FBS. VP-containing  
451 supernatant was collected at 72 h post-transfection, clarified by centrifugation, filtered  
452 through a 0.45 µm filter (GE Healthcare, cat. 67802504), aliquoted and stored at -80 °C until  
453 use. For each production batch, one aliquot was titrated after a single freeze-thaw cycle using  
454 the QuickTiter Lentivirus Titer Kit (Cell Biolabs, California, USA. cat. VPK-107) according  
455 to the manufacturer's protocol.

456

#### 457 **Flow cytometry**

458 ACE2 expression was measured on all cell lines by flow cytometry using a FACS Celesta  
459 fitted with 405 nm, 488 nm and 533 nm lasers (BD Biosciences). Briefly 3 x10<sup>5</sup> cells were  
460 incubated on ice with mouse anti-human ACE2 monoclonal antibody conjugated to AF-647  
461 (Santa Cruz Biotechnology, USA, cat. SC-390851) following manufacturer's instructions.  
462 Propidium iodide (BD Biosciences, cat. 51-6621E) was added 15 min before acquisition on  
463 the flow cytometer, as per manufacturer's instructions. At least 20,000 events were acquired  
464 per sample, and the data was analysed using FlowJo v.10.

#### 465 **Transduction assay**

466 Transduction of target cells by VP was assessed by measuring the level of luminescence  
467 induced by the conversion of furimazine, reported in RLU, using a commercial kit according  
468 to manufacturer's instructions (Promega, USA. cat. N1110), including reading at 460 nm on  
469 a Biotek Synergy Microplate Reader. Uninfected cells were used for normalization.

#### 470 **Western blot**

471 The selective incorporation of SARS-CoV-2-S or VSV-G, and p24 proteins in VP was  
472 validated by western blot. Briefly, supernatants were pelleted by ultra-centrifugation at  
473 25,000 g for 2 h over a 20% sucrose cushion. The supernatant was removed, and the viral

474 pellet was resuspended in 60  $\mu$ l of PBS. Thirty  $\mu$ l of each sample were subjected to SDS-  
475 PAGE followed by immunoblotting on PVDF membranes. Mouse anti-VSV-G-HRP (Santa  
476 Cruz, cat. SC-365019-HRP) and mouse anti-HIV1-p24-HRP (Santa Cruz, cat. 69728-HRP)  
477 were used for one-step detection. A chimeric monoclonal antibody (Sino Biological, cat  
478 40150-D001) was used to detected SARS-CoV-2-S as primary antibody, and a goat anti-  
479 human IgG conjugated to HRP (Bio-Rad, cat. 204005) was used as secondary antibody.  
480 Membranes were revealed using the Immobilon Forte Western HRP substrate (Millipore, cat.  
481 WBLUF0500) following the manufacturer's protocol. Chemiluminescence signal was  
482 acquired through ChemiDoc XR S+ (Bio-Rad).

483

#### 484 **TCID50 determination**

485 TCID50 assays were performed as previously described<sup>15</sup>. Viral stocks were serially diluted  
486 3-fold and each dilution assessed in 6 replicates in the infection of 25,000 Vero cells per well,  
487 seeded in a 96-well plate and incubated at 37 °C in a 5% CO<sub>2</sub> atmosphere. Twenty-four h  
488 post-seeding, luminescence was measured as a surrogate for infection as described above.

489

#### 490 **Pseudovirus-based SARS-CoV-2 Spike neutralization assay**

491 Protocols for the use of human samples for this work were approved by the IRB of the  
492 Instituto Mexicano del Seguro Social (IMSS) with reference number R-2020-785-068 prior  
493 to starting this work. A total of 15 SARS-CoV-2 free, collected between 2014 and 2018 (prior  
494 to the 2019 initial outbreak, collected through IRB approved protocols at IMSS, for bio  
495 banking purposes), and 18 COVID-19 blood samples were obtained from 15 patients  
496 (confirmed by a positive qRT-PCR diagnostic, Tables 1). Samples were collected and used  
497 upon signed informed consent and anonymization. Vaccinated sera were obtained from  
498 health care professionals receiving the BNT162b2 vaccine. Blood samples were collected  
499 between 14 and 16 days post-application of the first dose, and a second sampling was  
500 performed 27 to 29 days after the application of the second dose. Status of prior infection  
501 with SARS-CoV-2 was also recorded (Table 2). Briefly, sera were enriched from coagulated  
502 blood by centrifugation, inactivated for 30 min at 56 °C, and aliquoted and stored at -80 °C  
503 until use. On the day of the assay, sera were serially diluted 7-folds, spanning 1:5 to 1:9860,  
504 and 100  $\mu$ L of each dilution was incubated for 1 h at 37 °C and 5% CO<sub>2</sub>, together with 15 pg

505 of SARS-CoV-2 VP in duplicate in a 96-well plate. Post-incubation, 25,000 Vero cells were  
506 added to each well and the plate was incubated for 24 h at 37 °C and 5% CO<sub>2</sub>. As a positive  
507 control for transduction, SARS-CoV-2 VP were incubated with Vero cells. Vero cells seeded  
508 in triplicate were used for basal luminescence background assessment as described earlier.  
509 After 24 h, Nluc levels were measured as described above. Neutralization is described as %  
510 inhibition of transduction, calculated as: Inhibition (%)=(mean RLU of infected control  
511 wells – mean RLU of sera-treated well) x100.

512

### 513 **Statistical analysis**

514 All statistical analyzes were performed using GraphPad Prism v.9 software and p-values <  
515 0.05 were considered statistically significant. In the case of categorical values for calculation  
516 of Sn and Sp, a contingency 2x2 table was used with a fisher exact test. For flow cytometry  
517 analyzes, medians of fluorescence intensity and percentage of positive cells were compared  
518 using Mann-Whitney and P values are reported. To estimate EC50, neutralization curves  
519 were log transformed, normalized, and fitted to the most appropriate model between  
520 log(inhibitor) vs. response (three parameters) and log(inhibitor) vs. response, variable slope  
521 (four parameters). For calculating sensitivity and specificity of the assay, we determined sera  
522 positivity and negativity at a final 1:20 dilution and using a 30% neutralization threshold, as  
523 previously reported to evidence true/false positives and true/false negatives<sup>43</sup>.

524

### 525 **Acknowledgements**

526 We warmly thank Dr. Zhaohui Qian (Institute of Pathogen Biology, Beijing, China) for  
527 sharing pCMV14-3X-Flag-SARS-CoV-2 S with us. We acknowledge the financial support  
528 received by CONACYT (scholarships 1007842 and 657487), Secretaría de Relaciones  
529 Exteriores, Tecnológico de Monterrey and StrainBiotech S.A de C.V, that made this work  
530 possible.

531

### 532 **References**

533 1. Mercurio, I., Tragni, V., Busto, F., De Grassi, A. & Pierri, C. L. Protein structure  
534 analysis of the interactions between SARS-CoV-2 spike protein and the human ACE2



- 535 receptor: from conformational changes to novel neutralizing antibodies. *Cell. Mol. Life*  
536 *Sci.* **78**, 1501–1522 (2021).
- 537 2. Du, L., Yang, Y. & Zhang, X. Neutralizing antibodies for the prevention and treatment  
538 of COVID-19. *Cell Mol Immunol* **18**, 2293–2306 (2021).
- 539 3. Ou, X. *et al.* Characterization of spike glycoprotein of SARS-CoV-2 on virus entry and  
540 its immune cross-reactivity with SARS-CoV. *Nature Communications* **11**, 1620 (2020).
- 541 4. Lucas, C. *et al.* Delayed production of neutralizing antibodies correlates with fatal  
542 COVID-19. *Nat Med* **27**, 1178–1186 (2021).
- 543 5. Addetia, A. *et al.* Neutralizing antibodies correlate with protection from SARS-CoV-2  
544 in humans during a fishery vessel outbreak with high attack rate. *medRxiv*  
545 2020.08.13.20173161 (2020) doi:10.1101/2020.08.13.20173161.
- 546 6. Khoury, D. S. *et al.* Neutralizing antibody levels are highly predictive of immune  
547 protection from symptomatic SARS-CoV-2 infection. *Nat Med* **27**, 1205–1211 (2021).
- 548 7. Wan, J. *et al.* Human-IgG-Neutralizing Monoclonal Antibodies Block the SARS-CoV-  
549 2 Infection. *Cell Reports* **32**, 107918 (2020).
- 550 8. Maisonnasse, P. *et al.* COVA1-18 neutralizing antibody protects against SARS-CoV-2  
551 in three preclinical models. *Nat Commun* **12**, 6097 (2021).
- 552 9. Tuccori, M. *et al.* Anti-SARS-CoV-2 neutralizing monoclonal antibodies: clinical  
553 pipeline. *mAbs* **12**, 1854149 (2020).
- 554 10. Razonable, R. R. *et al.* Casirivimab–Imdevimab treatment is associated with reduced  
555 rates of hospitalization among high-risk patients with mild to moderate coronavirus  
556 disease-19. *EClinicalMedicine* **40**, 101102 (2021).
- 557 11. Pulliam, J. R. C. *et al.* Increased risk of SARS-CoV-2 reinfection associated with  
558 emergence of the Omicron variant in South Africa. 2021.11.11.21266068



- 559 <https://www.medrxiv.org/content/10.1101/2021.11.11.21266068v2> (2021)
- 560 doi:10.1101/2021.11.11.21266068.
- 561 12. Planas, D. *et al.* Reduced sensitivity of SARS-CoV-2 variant Delta to antibody  
562 neutralization. *Nature* **596**, 276–280 (2021).
- 563 13. Rodríguez Mega, E. Latin American scientists join the coronavirus vaccine race: ‘No  
564 one’s coming to rescue us’. *Nature* **582**, 470–471 (2020).
- 565 14. Chen, M. & Zhang, X.-E. Construction and applications of SARS-CoV-2  
566 pseudoviruses: a mini review. *Int J Biol Sci* **17**, 1574–1580 (2021).
- 567 15. Hernández-Bello, J. *et al.* Neutralizing Antibodies against SARS-CoV-2, Anti-Ad5  
568 Antibodies, and Reactogenicity in Response to Ad5-nCoV (CanSino Biologics)  
569 Vaccine in Individuals with and without Prior SARS-CoV-2. *Vaccines* **9**, 1047 (2021).
- 570 16. Morales-Núñez, J. J. *et al.* Neutralizing Antibodies Titers and Side Effects in Response  
571 to BNT162b2 Vaccine in Healthcare Workers with and without Prior SARS-CoV-2  
572 Infection. *Vaccines* **9**, 742 (2021).
- 573 17. Muñoz-Medina, J. E. *et al.* SARS-CoV-2 IgG Antibodies Seroprevalence and Sera  
574 Neutralizing Activity in MEXICO: A National Cross-Sectional Study during 2020.  
575 *Microorganisms* **9**, 850 (2021).
- 576 18. Nie, J. *et al.* Establishment and validation of a pseudovirus neutralization assay for  
577 SARS-CoV-2. *Emerg Microbes Infect* **9**, 680–686 (2020).
- 578 19. Hoffmann, M. *et al.* SARS-CoV-2 Cell Entry Depends on ACE2 and TMPRSS2 and Is  
579 Blocked by a Clinically Proven Protease Inhibitor. *Cell* **181**, 271-280.e8 (2020).
- 580 20. Schmidt, F. *et al.* Measuring SARS-CoV-2 neutralizing antibody activity using  
581 pseudotyped and chimeric viruses. *J Exp Med* **217**, (2020).

- 582 21. Stamatakis, Z. *et al.* Hepatitis C virus envelope glycoprotein immunization of rodents  
583 elicits cross-reactive neutralizing antibodies. *Vaccine* **25**, 7773–7784 (2007).
- 584 22. Zhao, G. *et al.* A safe and convenient pseudovirus-based inhibition assay to detect  
585 neutralizing antibodies and screen for viral entry inhibitors against the novel human  
586 coronavirus MERS-CoV. *Virology Journal* **10**, 266 (2013).
- 587 23. Beltrán-Pavez, C. *et al.* Insights into neutralizing antibody responses in individuals  
588 exposed to SARS-CoV-2 in Chile. *Sci Adv* **7**, (2021).
- 589 24. Qiu, C. *et al.* Safe Pseudovirus-based Assay for Neutralization Antibodies against  
590 Influenza A(H7N9) Virus. *Emerg Infect Dis* **19**, 1685–1687 (2013).
- 591 25. Zheng, Y. *et al.* Neutralization assay with SARS-CoV-1 and SARS-CoV-2 spike  
592 pseudotyped murine leukemia virions. *Virology Journal* **18**, 1 (2021).
- 593 26. Hall, M. P. *et al.* Engineered Luciferase Reporter from a Deep Sea Shrimp Utilizing a  
594 Novel Imidazopyrazinone Substrate. *ACS Chem. Biol.* **7**, 1848–1857 (2012).
- 595 27. Kutner, R. H., Zhang, X.-Y. & Reiser, J. Production, concentration and titration of  
596 pseudotyped HIV-1-based lentiviral vectors. *Nat Protoc* **4**, 495–505 (2009).
- 597 28. Berkhout, B. A Fourth Generation Lentiviral Vector: Simplifying Genomic  
598 Gymnastics. *Molecular Therapy* **25**, 1741–1743 (2017).
- 599 29. Brinkmann, C. *et al.* The glycoprotein of vesicular stomatitis virus promotes release of  
600 virus-like particles from tetherin-positive cells. *PLoS ONE* **12**, e0189073 (2017).
- 601 30. Hofmann, H. *et al.* Susceptibility to SARS coronavirus S protein-driven infection  
602 correlates with expression of angiotensin converting enzyme 2 and infection can be  
603 blocked by soluble receptor. *Biochemical and Biophysical Research Communications*  
604 **319**, 1216–1221 (2004).

- 605 31. Chu, H. *et al.* Comparative tropism, replication kinetics, and cell damage profiling of  
606 SARS-CoV-2 and SARS-CoV with implications for clinical manifestations,  
607 transmissibility, and laboratory studies of COVID-19: an observational study. *The*  
608 *Lancet Microbe* **1**, e14–e23 (2020).
- 609 32. Ogando, N. S. *et al.* SARS-coronavirus-2 replication in Vero E6 cells: replication  
610 kinetics, rapid adaptation and cytopathology. *J Gen Virol* **101**, 925–940 (2020).
- 611 33. Pohl, M. O. *et al.* SARS-CoV-2 variants reveal features critical for replication in  
612 primary human cells. *PLOS Biology* **19**, e3001006 (2021).
- 613 34. Sherman, E. J. & Emmer, B. T. ACE2 protein expression within isogenic cell lines is  
614 heterogeneous and associated with distinct transcriptomes. *Sci Rep* **11**, 15900 (2021).
- 615 35. Bayati, A., Kumar, R., Francis, V. & McPherson, P. S. SARS-CoV-2 infects cells after  
616 viral entry via clathrin-mediated endocytosis. *Journal of Biological Chemistry* **296**,  
617 (2021).
- 618 36. Hattermann, K. *et al.* Susceptibility of different eukaryotic cell lines to SARS-  
619 coronavirus. *Arch Virol* **150**, 1023–1031 (2005).
- 620 37. Saccon, E. *et al.* Cell-type-resolved quantitative proteomics map of interferon response  
621 against SARS-CoV-2. *iScience* **24**, (2021).
- 622 38. Cantuti-Castelvetri, L. *et al.* Neuropilin-1 facilitates SARS-CoV-2 cell entry and  
623 infectivity. *Science* **370**, 856–860 (2020).
- 624 39. REED, L. J. & MUENCH, H. A SIMPLE METHOD OF ESTIMATING FIFTY PER  
625 CENT ENDPOINTS<sup>12</sup>. *American Journal of Epidemiology* **27**, 493–497 (1938).
- 626 40. Nie, J. *et al.* Quantification of SARS-CoV-2 neutralizing antibody by a pseudotyped  
627 virus-based assay. *Nat Protoc* **15**, 3699–3715 (2020).

- 628 41. Legros, V. *et al.* A longitudinal study of SARS-CoV-2-infected patients reveals a high  
629 correlation between neutralizing antibodies and COVID-19 severity. *Cellular &*  
630 *Molecular Immunology* **18**, 318–327 (2021).
- 631 42. Wec, A. Z. *et al.* Broad neutralization of SARS-related viruses by human monoclonal  
632 antibodies. *Science* **369**, 731–736 (2020).
- 633 43. Tan, C. W. *et al.* A SARS-CoV-2 surrogate virus neutralization test based on antibody-  
634 mediated blockage of ACE2–spike protein–protein interaction. *Nat Biotechnol* (2020)  
635 doi:10.1038/s41587-020-0631-z.
- 636 44. Xiong, H.-L. *et al.* Robust neutralization assay based on SARS-CoV-2 S-protein-  
637 bearing vesicular stomatitis virus (VSV) pseudovirus and ACE2-overexpressing  
638 BHK21 cells. *Emerging Microbes & Infections* **9**, 2105–2113 (2020).
- 639 45. The herd-immunity threshold must be updated for multi-vaccine strategies and multiple  
640 variants | Scientific Reports. <https://www.nature.com/articles/s41598-021-00083-2>.
- 641 46. Bayart, J.-L. *et al.* Waning of IgG, Total and Neutralizing Antibodies 6 Months Post-  
642 Vaccination with BNT162b2 in Healthcare Workers. *Vaccines* **9**, 1092 (2021).
- 643 47. Bello-Chavolla, O. Y. *et al.* Predicting Mortality Due to SARS-CoV-2: A Mechanistic  
644 Score Relating Obesity and Diabetes to COVID-19 Outcomes in Mexico. *The Journal*  
645 *of Clinical Endocrinology & Metabolism* **105**, 2752–2761 (2020).
- 646 48. Kammar-García, A. *et al.* Impact of Comorbidities in Mexican SARS-CoV-2-Positive  
647 Patients: A Retrospective Analysis in a National Cohort. *Revista de investigación*  
648 *clínica* **72**, 151–158 (2020).
- 649 49. Peña, J. E. la *et al.* Hypertension, Diabetes and Obesity, Major Risk Factors for Death  
650 in Patients with COVID-19 in Mexico. *Archives of Medical Research* **52**, 443–449  
651 (2021).

- 652 50. Poston, D. *et al.* Absence of Severe Acute Respiratory Syndrome Coronavirus 2  
653 Neutralizing Activity in Prepandemic Sera From Individuals With Recent Seasonal  
654 Coronavirus Infection. *Clin Infect Dis* **73**, e1208–e1211 (2020).
- 655 51. Riepler, L. *et al.* Comparison of Four SARS-CoV-2 Neutralization Assays. *Vaccines*  
656 (*Basel*) **9**, 13 (2020).
- 657 52. Development of cell-based pseudovirus entry assay to identify potential viral entry  
658 inhibitors and neutralizing antibodies against SARS-CoV-2 | Elsevier Enhanced  
659 Reader.  
660 [https://reader.elsevier.com/reader/sd/pii/S2352304220300891?token=5697908C7C5B4](https://reader.elsevier.com/reader/sd/pii/S2352304220300891?token=5697908C7C5B466B1A7BA880CAE660EB0087A9063466DD47D18A470E911EC93E6D456E9299E5642DD77B3A4EB1F53573&originRegion=us-east-1&originCreation=20211206054103)  
661 [66B1A7BA880CAE660EB0087A9063466DD47D18A470E911EC93E6D456E9299E5](https://reader.elsevier.com/reader/sd/pii/S2352304220300891?token=5697908C7C5B466B1A7BA880CAE660EB0087A9063466DD47D18A470E911EC93E6D456E9299E5642DD77B3A4EB1F53573&originRegion=us-east-1&originCreation=20211206054103)  
662 [642DD77B3A4EB1F53573&originRegion=us-east-](https://reader.elsevier.com/reader/sd/pii/S2352304220300891?token=5697908C7C5B466B1A7BA880CAE660EB0087A9063466DD47D18A470E911EC93E6D456E9299E5642DD77B3A4EB1F53573&originRegion=us-east-1&originCreation=20211206054103)  
663 [1&originCreation=20211206054103](https://reader.elsevier.com/reader/sd/pii/S2352304220300891?token=5697908C7C5B466B1A7BA880CAE660EB0087A9063466DD47D18A470E911EC93E6D456E9299E5642DD77B3A4EB1F53573&originRegion=us-east-1&originCreation=20211206054103) doi:10.1016/j.gendis.2020.07.006.
- 664 53. He, C. *et al.* A bivalent recombinant vaccine targeting the S1 protein induces  
665 neutralizing antibodies against both SARS-CoV-2 variants and wild-type of the virus.  
666 *MedComm* **2**, 430–441 (2021).
- 667 54. Liu, L. *et al.* Potent neutralizing antibodies against multiple epitopes on SARS-CoV-2  
668 spike. *Nature* **584**, 450–456 (2020).
- 669 55. Lambert, D. W. *et al.* Tumor Necrosis Factor- $\alpha$  Convertase (ADAM17) Mediates  
670 Regulated Ectodomain Shedding of the Severe-acute Respiratory Syndrome-  
671 Coronavirus (SARS-CoV) Receptor, Angiotensin-converting Enzyme-2 (ACE2) \*.  
672 *Journal of Biological Chemistry* **280**, 30113–30119 (2005).
- 673 56. Heurich, A. *et al.* TMPRSS2 and ADAM17 Cleave ACE2 Differentially and Only  
674 Proteolysis by TMPRSS2 Augments Entry Driven by the Severe Acute Respiratory  
675 Syndrome Coronavirus Spike Protein. *Journal of Virology* **88**, 1293–1307 (2014).

- 676 57. Garcia-Beltran, W. F. *et al.* COVID-19-neutralizing antibodies predict disease severity  
677 and survival. *Cell* **184**, 476-488.e11 (2021).
- 678 58. Oguntuyo, K. Y. *et al.* Quantifying Absolute Neutralization Titers against SARS-CoV-  
679 2 by a Standardized Virus Neutralization Assay Allows for Cross-Cohort Comparisons  
680 of COVID-19 Sera. *mBio* **12**, e02492-20.
- 681 59. Wu, F. *et al.* *Neutralizing antibody responses to SARS-CoV-2 in a COVID-19*  
682 *recovered patient cohort and their implications*. 2020.03.30.20047365  
683 <https://www.medrxiv.org/content/10.1101/2020.03.30.20047365v2> (2020)  
684 doi:10.1101/2020.03.30.20047365.
- 685 60. Robbiani, D. F. *et al.* Convergent antibody responses to SARS-CoV-2 in convalescent  
686 individuals. *Nature* **584**, 437–442 (2020).
- 687 61. Huang, A. T. *et al.* A systematic review of antibody mediated immunity to  
688 coronaviruses: kinetics, correlates of protection, and association with severity. *Nature*  
689 *Communications* **11**, 4704 (2020).
- 690 62. Luo, Y. R., Chakraborty, I., Yun, C., Wu, A. H. B. & Lynch, K. L. Kinetics of Severe  
691 Acute Respiratory Syndrome Coronavirus 2 (SARS-CoV-2) Antibody Avidity  
692 Maturation and Association with Disease Severity. *Clinical Infectious Diseases*  
693 ciaa1389 (2020) doi:10.1093/cid/ciaa1389.
- 694  
695  
696  
697  
698  
699  
700

701 **Sup. Fig. 1:** Sequences of relevant plasmid portions obtained through Sanger sequencing

702 **A. Spike  $\Delta$ 19**

703 ATGTTTCGTTTTCTTGTCTGTTGCCTCTCGTTAGTAGCCAATGCGTCAACCTTA  
704 CTACTAGAACCAGCTCCCTCCAGCATATACCAACTCTTTCACCAGGGGCGTAT  
705 ATTACCCGGACAAAGTGTTCGCTCAAGTGTGCTGCATTCTACGCAGGACCTTT  
706 TCTTGCCCTTTTTCAGTAATGTTACTTGGTTTCATGCTATCCATGTGTCTGGAAC  
707 TAACGGAACCAAGCGCTTTGACAACCCCGTCCTCCCTTTCAACGATGGCGTGTA  
708 CTTGCTTCCACGAAAAGTCAAACATAATTCGCGGCTGGATCTTTGGTACAAC  
709 ACTCGACTCAAAGACGCAGAGCCTGCTGATCGTTAATAACGCTACAAATGTTG  
710 TGATAAAGGTGTGTGAATTCAGTTCTGCAATGATCCCTTCTGGGTGTGTACT  
711 ACCATAAGAATAACAAGAGCTGGATGGAATCCGAATTTAGGGTTTACAGTTCC  
712 GCTAACAACTGCACATTCGAATACGTAAGCCAGCCATTTCTTATGGATCTTGAG  
713 GGCAAGCAAGGAACTTCAAGAACTTGAGGGAGTTCGTGTTCAAAAATATCGA  
714 CGGCTATTTAAGATATATAGCAAGCACACTCCAATAAACTTGGTGCGCGACCT  
715 GCCCCAGGGATTCTCTGCTCTGGAGCCCCTGGTGGATCTGCCATTGGAATAAA  
716 CATAACTCGCTTTCAAACACTGCTCGCCCTGCATCGCAGTTACCTCACCCCTGG  
717 TGATAGTAGTTCAGGATGGACAGCAGGAGCCGCCGATACTACGTGGCTACC  
718 TGCAGCCTAGGACCTTCTTGCTGAAGTACAACGAGAACGGTACAATAACTGAC  
719 GCTGTGGACTGCGCTCTGGACCCTCTGTCCGAGACGAAGTGCACCCTGAAGAG  
720 CTTTACTGTTGAAAAGGCATTTACCAAACCAGCAACTTCCGCGTCCAGCCAAC  
721 CGAGAGCATCGTCAGATTTCCCAACATTACAAATCTGTGTCCCTTCGGCGAGGT  
722 GTTCAACGCCACACGCTTCGCTTCAGTGTACGCATGGAACCGCAAGCGCATATC  
723 TAACTGCGTCGCGGATTATTCTGTCCTCTACAACCTCCGCCTTTTCTCCACCTTC  
724 AAGTGCTACGGAGTGCACCGACTAAGCTGAACGATCTCTGCTTTACCAACGTC  
725 TACGCGGACTCCTTCGTGATAAGAGGTGATGAAGTGAGACAAATAGCCCCAGG  
726 TCAGACTGGTAAGATCGCAGATTACAACATAAATTGCCTGATGATTTCACTGG  
727 TTGCGTTATCGCGTGGAACCTCTAATAACCTCGATTCTAAGGTCGGTGGTAACTA  
728 CAATTACCTGTACCGCTTGTTTAGGAAGTCAAACCTGAAGCCTTTCGAGAGGGA  
729 TATTTCAACCGAAATCTATCAAGCGGGTTCAACACCGTGTAAACGGTGTGGAAG  
730 GATTTAACTGCTACTTCCCCCTGCAGTCTTACGGATTCCAGCCAACCAATGGCG  
731 TGGGTTACCAACCTTATCGCGTGGTGGTTCTGAGTTTCGAACTGTTGCACGCTC  
732 CCGCCACGGTATGCGGTCCCAAGAAGAGCACTAACTTGGTGAAGAATAAGTGC  
733 GTGAATTTCAATTTCAATGGCCTCACTGGAACCTGGAGTGCTGACCGAATCCAAT  
734 AAGAAGTTCTTGCCCTTCCAGCAGTTCGGAAGAGACATTGCTGACACAACCGA  
735 CGCGGTGCGCGATCCTCAGACTCTGGAGATATTGGACATTACACCATGTTCTTT  
736 CGGCGGTGTGTCTGTCACTTCCGGGCACGAATACTAGCAACCAGGTAGCCG  
737 TGCTGTACCAAGACGTGAATTGCACAGAGGTTCCCGTCGCAATTCACGCTGACC  
738 AGCTGACCCCCACGTGGAGGGTTTACAGCACTGGTAGTAACGTCTTCCAGACG  
739 AGAGCCGGTTGCTTGATCGGAGCGGAACATGTGAATAACTCCTACGAGTGCGA

740 CATCCCCATCGGAGCCGGTATATGCGCCTCTTATCAGACACAACTAACTCACC  
741 CAGGAGAGCCCGCAGTGTGGCTTCTCAAAGCATTATAGCATACTATGTCTCT  
742 TGGTGCCGAAAATTCCGTGGCCTATTCTAACAATTC AATCGCCATCCCAACCAA  
743 CTTCACAATTAGCGTGACTACCGAAATACTGCCTGTGAGCATGACGAAAACCA  
744 GCGTAGACTGCACTATGTATATCTGTGGAGACTCCACTGAGTGCTCCAACCTTC  
745 TCCTGCAGTACGGTAGCTTCTGTACCCAATTGAACCGCGCCCTTACAGGCATCG  
746 CTGTTGAGCAAGATAAGAATACCCAGGAAGTTTTTGCCAGGTTAAGCAGATA  
747 TACAAAACACCGCCCATTAAGGACTTCGGAGGCTTCAACTTCTCTCAGATACTG  
748 CCTGACCCCTCCAAGCCATCAAAACGCAGCTTCATTGAGGACCTCTTGTTCAAC  
749 AAAGTGACTCTGGCTGATGCTGGCTTCATTAAGCAGTACGGAGATTGCCTGGG  
750 AGATATTGCTGCCAGGGACCTCATCTGCGCCAGAAGTTTAATGGCCTGACAGT  
751 CTTGCCCCCACTTCTGACAGACGAGATGATTGCTCAGTACACATCTGCCCTCCT  
752 CGCTGGCACCATAACATCCGGATGGACATTTGGTGCTGGTGCTGCCCTCCAGAT  
753 TCCCTTCGCAATGCAGATGGCGTATCGCTTTAACGGCATCGGTGTCACACAAAA  
754 CGTGTGTATGAGAACC AAAAGCTCATCGCTAACCAGTTTAATTCTGCTATTGG  
755 TAAGATTCAGGACAGCCTGTCATCAACCGCGTCTGCCCTTGGAAGTTGCAGGA  
756 CGTGGTGAACCAGAATGCTCAGGCTTTGAATACTCTGGTGAAGCAACTCTCTTC  
757 AAATTCGGCGCTATCTCTTCTGTGTTGAACGACATCCTGAGTCGCCTTGATAA  
758 GGTGGAAGCTGAAGTTCAAATTGATAGATTGATTACTGGCAGGCTCCAGTCTTT  
759 GCAGACCTACGTTACACAGCAGCTGATTAGGGGCGGCTGAAATTAGAGCTTCCG  
760 CCAATCTGGCTGCAACCAAGATGTCCGAATGCGTCCTGGGTCAGTCAAAGCGC  
761 GTTACTTTTTGTGGTAAAGGCTACCACCTCATGTCAATTTCCCCAGTCAGCACCT  
762 CACGGAGTAGTGTTCCCTCCACGTCACCTACGTTCCAGCACAGGAAAAGAATTTT  
763 ACCACTGCGCCGGCAATCTGTCACGACGGTAAGGCACACTTCCCCCGCGAGGG  
764 CGTATTCGTGTCTAACGGAACCTCATTGGTTCGTCACACAGAGAACTTCTATGA  
765 GCCTCAGATCATTACCACCGACAATACATTTGTGTCCGGTAACTGCGACGTTGT  
766 GATTGGAATCGTCAACAACACTGTGTACGATCCACTTCAGCCAGA ACTGGATA  
767 GCTTCAAGGAAGAATTGGACAAATATTTCAAAAATCACACTTCACCCGATGTG  
768 GACCTGGGTGACATTAGTGGTATCAATGCGTCCGTGGTCAATATTC AAAAAGA  
769 GATTGACAGGCTCAACGAAGTGGCCAAGAACCTGAACGAAAGTCTTATCGATC  
770 TGCAAGAATTGGGAAAGTATGAGCAGTACATCAAGTGGCCGTGGTACATTTGG  
771 TTGGGTTTTATCGCCGGTCTGATCGCCATCGTTATGGTTACCATTATGCTTTGCT  
772 GCATGACGAGCTGTTGCTCCTGTCTGAAGGGATGCTGCTCTTGCGGATCATGTT  
773 GC

774

## 775 **B. Rev gene**

776 ATGGCAGGAAGAAGCGGAGACAGCGACGAAGACCTCCTCAAGGCAGTCAGAC  
777 TCATCAAGTTTCTCTATCAAAGCAACCCACCTCCCAATCCCGAGGGGACCCGAC  
778 AGGCCCGAAGGAATAGAAGAAGAAGGTGGAGAGAGAGACAGAGACAGATCC



779 ATTCGATTAGTGAACGGATCCTTAGCACTTATCTGGGACGATCTGCGGAGCCTG  
780 TGCCTCTTCAGCTACCACCGCTTGAGAGACTTACTCTTGATTGTAACGAGGATT  
781 GTGGAACCTTCTGGGACGCAGGGGGTGGGAAGCCCTCAAATATTGGTGGAATCT  
782 CCTACAATATTGGAGTCAGGAGCTAAAGAATAG

783

#### 784 **C. 5' LTR**

785 GGGTCTCTCTGGTTAGACCAGATCTGAGCCTGGGAGCTCTCTGGCTAACTAGGG  
786 AACCCACTGCTTAAGCCTCAATAAAGCTTGCCTTGAGTGCTTCAAGTAGTGTGT  
787 GCCCGTCTGTTGTGTGACTCTGGTAACTAGAGATCCCTCAGACCCTTTTAGTCA  
788 GTGTGGAAAATCTCTAGCA

789

#### 790 **D. 3' LTR**

791 TGGAAGGGCTAATTCCTCCCAACGAAGACAAGATCTGCTTTTTGCTTGTACTG  
792 GGTCTCTCTGGTTAGACCAGATCTGAGCCTGGGAGCTCTCTGGCTAACTAGGGA  
793 ACCCACTGCTTAAGCCTCAATAAAGCTTGCCTTGAGTGCTTCAAGTAGTGTGTG  
794 CCCGTCTGTTGTGTGACTCTGGTAACTAGAGATCCCTCAGACCCTTTTAGTCAG  
795 TGTGGAAAATCTCTAGCA

#### 796 **E. Nluc gene**

797 ATGGTCTTCACACTCGAAGATTTTCGTTGGGGACTGGCGACAGACAGCCGGCTA  
798 CAACCTGGACCAAGTCCTTGAACAGGGAGGTGTGTCCAGTTTGTTCAGAATCT  
799 CGGGGTGTCCGTAACCTCCGATCCAAAGGATTGTCCTGAGCGGTGAAAATGGGC  
800 TGAAGATCGACATCCATGTCATCATCCCGTATGAAGGTCTGAGCGGCGACCAA  
801 ATGGGCCAGATCGAAAAAATTTTTAAGGTGGTGTACCCTGTGGACGATCATCA  
802 CTTTAAGGTGATCCTGCACTATGGCACACTGGTAATCGACGGGGTTACGCCGA  
803 ACATGATCGACTATTTTCGGACGGCCGTATGAAGGCATCGCCGTGTTTCGACGGC  
804 AAAAAGATCACTGTAACAGGGACCCTGTGGAACGGCAACAAAATTATCGACGA  
805 GCGCCTGATCAACCCCGACGGCTCCCTGCTGTTCCGAGTAACCATCAACGGAGT  
806 GACCGGCTGGCGGCTGTGCGAACGCATTCTGGCGTAA

807

#### 808 **F. RRE**

809 AGGAGCTTTGTTCCCTTGGGTTCTTGGGAGCAGCAGGAAGCACTATGGGCGCAG  
810 CGTCAATGACGCTGACGGTACAGGCCAGACAATTATTGTCTGGTATAGTGCAG  
811 CAGCAGAACAAATTTGCTGAGGGCTATTGAGGGCGCAACAGCATCTGTTGCAACT  
812 CACAGTCTGGGGCATCAAGCAGCTCCAGGCAAGAATCCTGGCTGTGGAAAGAT  
813 ACCTAAAGGATCAACAGCTCCT

814

### G. cPPT

815 TTTTAAAAGAAAAGGGGGGATTGGGGGGTACAGTGCAGGGGAAAGAATAGTA  
816 GACATAATAGCAACAGACATACAAACTAAAGAATTACAAAAACAAATTACAA  
817 AAATTCAAATTTT

818

819

### H. WPRE

820 AATCAACCTCTGGATTACAAAATTTGTGAAAGATTGACTGGTATTCTTAACTAT  
821 GTTGCTCCTTTTACGCTATGTGGATACGCTGCTTTAATGCCTTTGTATCATGCTA  
822 TTGCTTCCCGTATGGCTTTCATTTTCTCCTCCTTGTATAAATCCTGGTTGCTGTCT  
823 CTTTATGAGGAGTTGTGGCCCGTTGTCAGGCAACGTGGCGTGGTGTGCACTGTG  
824 TTTGCTGACGCAACCCCACTGGTTGGGGCATTGCCACCACCTGTCAGCTCCTT  
825 TCCGGGACTTTCGCTTTCCTCCCTATTGCCACGGCGGAACATCGCCGCC  
826 TGCCTTGCCCGCTGCTGGACAGGGGCTCGGCTGTTGGGCACTGACAATTCCGTG  
827 GTGTTGTCGGGGAAATCATCGTCCCTTCCTTGGCTGCTCGCCTGTGTTGCCACCT  
828 GGATTCTGCGCGGGACGTCTTCTGCTACGTCCCTTCGGCCCTCAATCCAGCGG  
829 ACCTTCCTTCCCGCGGCCTGCTGCCGGCTCTGCGGCCTCTCCGCGTCTTCGCT  
830 TCGCCCTCAGACGAGTCGGATCTCCCTTTGGGCCGCCTCCCCGC

831

832

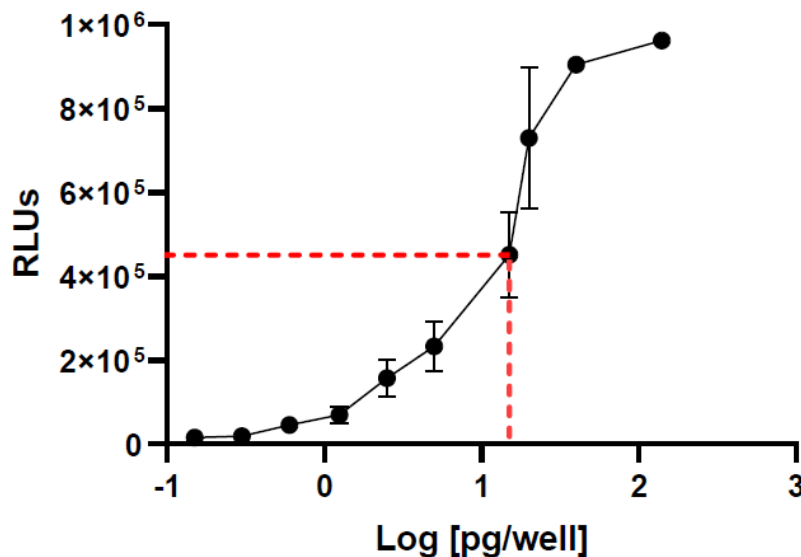

833

834 **Sup. Fig. 2:** Determination of the TCID<sub>50</sub> of SARS-CoV-2 S pseudovirus using 25,000 Vero  
835 cells as target in 96 well plate with infection assessed at 24 h. The dotted line represents 50%

836 of maximal RLU equivalent to 15 pg VP per well. The average of 2 independent experiments,  
837 ran in triplicate, is shown. Error bars indicate SD
